# Supplementary material
Source: PubMed Central journal article supplement (PMC3265901)
Supplement: supp_M111.277871_Suppl.pdf [file supp_M111.277871_Suppl.pdf]

## SUPPLEMENTAL DATA

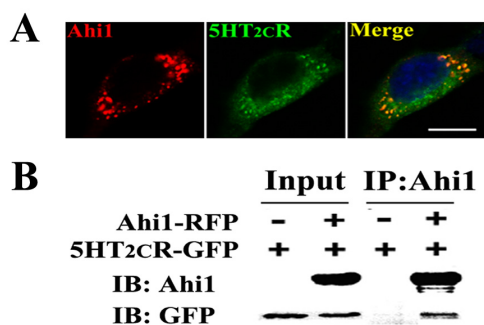

**Supplemental Figure 1** DsRed-Ahi1 and GFP-5-HT<sub>2C</sub>R were transfected into HEK293 cells, and immunofluorescence and co-IP were performed on these cells. (A) Immunofluorescence showed clear overlap of Ahi1 and 5-HT<sub>2C</sub>R in HEK293 cells. (B) Co-IP of 5-HT<sub>2C</sub>R with Ahi1 in transfected HEK293 cells. Scale bar: 10  $\mu$ m.

Abbreviation: IP, immunoprecipitation; IB, immunoblotting.

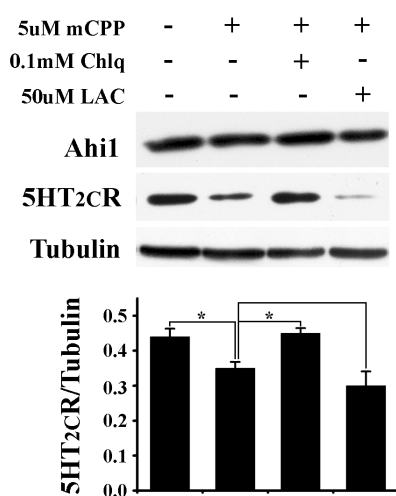

**Supplemental Figure 2** The degradation of 5-HT<sub>2C</sub>R mediated by Ahi1 was through lysosomal pathway rather than proteasome pathway. When we treated cells co-transfected with Ahi1 and 5-HT<sub>2C</sub>R by chloroquine (Chlq, a lysosomal inhibitor), the degradation of 5-HT<sub>2C</sub>R was reversed; whereas, the treatment of lactacystin (LAC, a proteasome inhibitor) did not reverse the degradation of 5-HT<sub>2C</sub>R. Abbreviation: mCPP, *meta*-chlorophenylpiperazine.

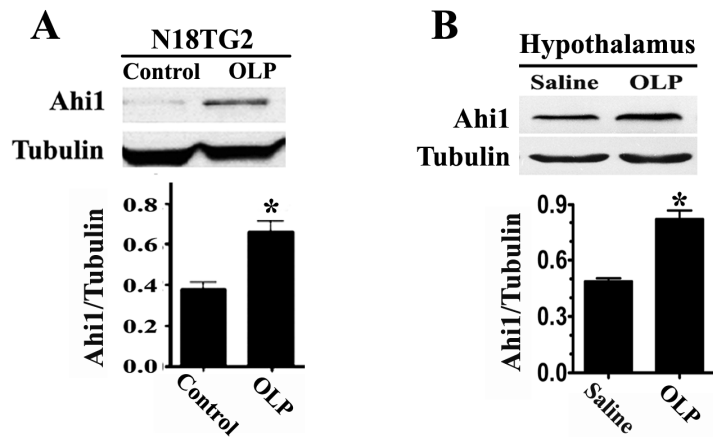

**Supplemental Figure 3 Olanzapine increased the expression of Ahi1.** (A) Ahi1 levels were measured in N18TG2 cells treated by OLP (Sigma) for 72 hours. OLP induced a significant increase of Ahi1 protein. (B) Mice were injected (i.p.) with OLP (Sigma, 2 mg/kg) for 4 weeks and the hypothalamic Ahi1 was measured by western blot. OLP treatment significantly increased the expression of Ahi1 in hypothalamus. Data are expressed as mean  $\pm$  SEM. \*Statistically different from control group. Abbreviation: OLP, olanzapine.

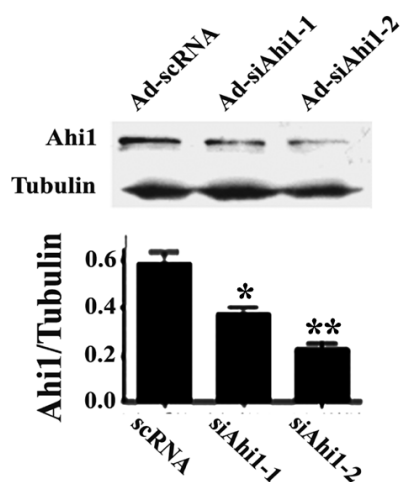

**Supplemental Figure 4 Ahi1-specific siRNA effectively inhibited the expression of endogenous Ahi1 in N18TG2 cells.** Western blot showed the concentration of  $10^7$  plaque-forming units of Ad-siAhi1-2 was effective in knocking down the expression of Ahi1. Data are expressed as mean  $\pm$  SEM. \*Statistically different from control group. Abbreviation: Ad-siAhi1, adenoviral vector with Ahi1-specific siRNA; Ad-scrRNA, adenoviral vector with scramble-siRNA.

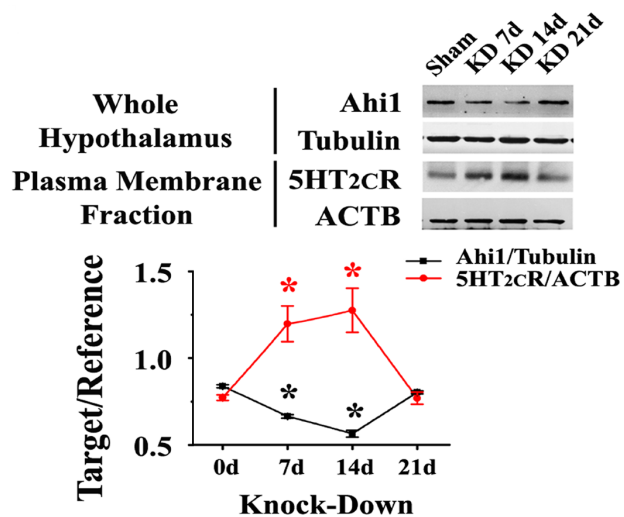

**Supplemental Figure 5 5-HT<sub>2C</sub>R located on the neuronal membrane under the condition of artificial knockdown by RNA interference.** As shown by western blot, the membrane distribution of 5-HT<sub>2C</sub>R significantly increased when the expression of Ahi1 was down-regulated, after which a regression followed that was due to Ahi1 expression recovery. Data are expressed as mean  $\pm$  SEM. \*Statistically different from control group. Abbreviation: KD, knockdown; ACTB, actin-beta.
